1 **Title Page**

2 **List Title:** Pneumococcal Colonisation is an Asymptomatic Event in Healthy Adults using an  
3 Experimental Human Colonisation Model.

4 **Authors:** \*Ashleigh Trimble<sup>2</sup>, \*Victoria Connor<sup>1,2</sup>, Ryan E Robinson<sup>1,2</sup>, Carole A Hancock<sup>1</sup>, Duolao  
5 Wang<sup>2</sup>, Stephen B Gordon<sup>2,3</sup>, Daniela M Ferreira<sup>2</sup>, \*\*Angela D Wright<sup>2,3</sup>, \*\*Andrea M Collins<sup>1,2</sup>.

6 \*  
Joint first authorship

7 \*\* Joint last authorship

8 <sup>1</sup>Respiratory Research Group at the Royal, Royal Liverpool and Broadgreen University Hospital  
9 Trust, Prescot Street, Liverpool, L7 8XP, UK. <sup>2</sup>Clinical Sciences Department, Liverpool Life  
10 Sciences Accelerator 1 Daulby Street Liverpool L7 8XZ. <sup>3</sup>Local Comprehensive Research  
11 Network, Northwest Coast, Liverpool, UK.

12

13 **\*Corresponding author:** Dr Andrea Collins, Liverpool Life Sciences Accelerator. 1 Daulby Street,  
14 Liverpool, L7 8XZ. 0151 7029439/07810 354171. andrea.collins@lstm.ac.uk

15 **Author contributions:**

16 AC, AW, DF, SG - writing the protocol

17 AC, DF, AW, SG - ethics submission

18 AC, AW, CH, DF, SG - study co-ordination

19 AC, AW, SG - clinical cover including on call responsibility

20 AC, AW, CH - recruiting and consenting participants

- 21 AC, AW, CH - sample collection
- 22 AC, AW, CH, AT, DW - data collection and management
- 23 AC, AW, SG, DF, AT, DW- statistical planning and analysis
- 24 DF - bacterial inoculum preparation and sample processing
- 25 SG - co-ordination of DMSC communications
- 26 AC, AW, SG, DF, AT, DW, VC, RR - manuscript preparation

27 **Total word count:**

28 **Funder:** Bill and Melinda Gates Grand Challenges Exploration Programme II. **Descriptor number:**  
29 10.12

30 **At a Glance Commentary:** The Experimental Human Pneumococcal Colonisation (EHPC) model  
31 has been established to test current and new pneumococcal vaccines. Literature suggests that  
32 pneumococcal colonisation in adults is an asymptomatic process but there is limited evidence to  
33 support this; therefore, we addressed the question using the EHPC model.

34 **Abstract**

35 255/ 300 words

36 **Introduction**

37 Pneumococcal colonisation is regarded as a pre-requisite for developing pneumococcal disease.  
38 In children previous studies have reported colonisation to be a symptomatic event and  
39 described a relationship between symptom severity/frequency and colonisation density. The  
40 evidence for this in adults is lacking in the literature. This study uses an experimental human

41 pneumococcal challenge model to explore whether pneumococcal colonisation (or co-  
42 colonisation with a respiratory virus) is a symptomatic event in healthy adults.

### 43 **Methods**

44 Healthy volunteers aged 18-50 were recruited and inoculated intra-nasally with either  
45 *Streptococcus pneumoniae* (serotypes 6B, 23F) or saline as a control. Respiratory viral swabs  
46 were obtained prior to inoculation. Nasal and non-nasal symptoms were then assessed using a  
47 modified Likert score between 1 (no symptoms) to 7 (cannot function). The rate of symptoms  
48 reported between groups was compared and a correlation analysis performed.

### 49 **Results**

50 Data from 54 participants were analysed. 46 were inoculated with *S. pneumoniae* (29 with 6B,  
51 17 with 23F) and 8 received saline. In total, 14 became experimentally colonised (30.4%), all of  
52 which were inoculated with 6B serotype. There was no statistically significant difference in nasal  
53 ( $p= 0.45$ ) or non-nasal symptoms ( $p=0.28$ ) between the pneumococcal inoculation group and  
54 the saline group. There was no direct correlation between colonisation density and symptom  
55 severity in those who were colonised. In the 22% (12/52) who were co-colonised with  
56 pneumococcus and respiratory viruses there was no statistical difference in either nasal or non-  
57 nasal symptoms (virus positive  $p=0.74$  and virus negative  $p=1.0$ ).

### 58 **Conclusion**

59 Pneumococcal colonisation is asymptomatic in healthy adults, regardless of bacterial density or  
60 viral co-colonisation.

61

## 62 Introduction

63

64 *Streptococcus pneumoniae* (pneumococcus, SPN) frequently colonises the human nasopharynx,  
65 with 40-95% of infants and 10-25% of adults being colonised at any one time(1).  
66 Pneumococcal/SPN colonisation rates also vary with geographical location, genetics and  
67 socioeconomic background(2). SPN colonisation is a dynamic process. Although multiple  
68 pneumococcal serotypes can both simultaneously and sequentially colonise, one serotype is  
69 usually the predominant current coloniser(3). In addition interspecies competition occurs  
70 between resident flora and potential colonisers including *S.pneumoniae*, *H.influenza* and  
71 *S.aureus*(4).

72 Colonisation of the nasopharynx is important as the pre-requisite for SPN infections including  
73 pneumonia, sepsis, meningitis and otitis media. Most colonisation episodes will not lead to  
74 subsequent disease. Colonisation is also thought to be the predominant source of  
75 immunological boosting against SPN infection in both children and adults(5, 6).

76 SPN colonisation appears to be asymptomatic in murine models(7) and in adults, however the  
77 current data are limited(8). Previous studies in children have demonstrated mild nasal  
78 symptoms following colonisation(9). Furthermore, a relationship between symptom severity,  
79 pneumococcal density and pneumococcal/viral co-colonisation has also been noted in  
80 children(10).

81 Pneumococcal colonisation may cause nasal symptoms in two ways; the bacteria induce host  
82 secretions and inflammatory responses or in co-colonised subjects (pneumococcus and virus)  
83 due to viral proliferation inducing rhinitis(9). Some studies have also concluded that the

84 presence of respiratory viruses and/or other bacteria within the nasopharynx is the main cause  
85 of symptoms; this colonisation in turn increases the rate of pneumococcal colonisation(9).

86 We have used the novel experimental pneumococcal challenge model (EHPC) to investigate if  
87 the process of nasopharyngeal pneumococcal colonisation is symptomatic, causing either nasal  
88 symptoms or non-nasal symptoms. This model mimics natural pneumococcal colonisation in  
89 healthy human adults and has been used to effectively study mucosal immunity and as a  
90 platform to test the efficacy of pneumococcal vaccines in randomised control trials(11).

## 91 **Methods**

92 We recruited non-smoking healthy participants aged 18-60 years old. Specimen collection and  
93 sample processing were conducted in Liverpool, UK. All participants gave written, informed  
94 consent. Ethical permission was granted by local NHS Research and Ethics Committee (REC)  
95 (11/NW/0592 Liverpool-East). Exclusion criteria included natural pneumococcal colonisation at  
96 baseline, any chronic medical condition or regular medication (study participation could put the  
97 volunteer at increased risk of pneumococcal disease) and regular contact with an at-risk  
98 individual such as young children (study participation could put the at-risk individual at  
99 increased risk of pneumococcal disease).

100 Participants were nasally inoculated with  $8 \times 10^4$ ,  $1.6 \times 10^5$ , or  $3.2 \times 10^5$  mid-log phase colony  
101 forming units (CFU) *S. pneumoniae* (prepared as previously described)(6). Bacterial inoculation  
102 density was confirmed by serial dilutions of the inoculation stock onto blood agar (Oxoid). Two  
103 serotypes were used; 6B and 23F, both were fully sensitive to penicillin. 46 participants were  
104 inoculated with *S. pneumoniae* (SPN) as part of a dose-ranging study and 8 participants

105 inoculated with saline as a control group. Participants were allocated to be inoculated with  
106 either 6B, 23F or saline and were blinded to their group.

107 Pre-inoculation oropharyngeal swabs were assayed for respiratory viruses using multiplex  
108 Polymerase Chain reaction (PCR) as previously published (12). The PCR assay panel detected  
109 Influenza A and B, Respiratory syncytial virus, Human metapneumovirus, Human rhinovirus,  
110 Parainfluenza viruses 1-4 and Coronaviruses OC43, NL63, 229E and HKU1. Nasopharyngeal  
111 colonisation was assessed in nasal washes (Nucleiro technique, as previously described)  
112 collected at day 2, 7 and 14 post inoculation(13). Pneumococcal colonisation status and density  
113 in nasal washes was determined by classical culture as previously described(6, 13).

114 Participants were prompted to complete a daily symptom log on the day of inoculation  
115 (baseline) and daily for 7 days post-inoculation. Symptom log consisted of a 7-point visual  
116 analogue scale (a type of Likert scale) which assessed five nasal and five non-nasal  
117 symptoms(14). The only modification was removal of 'mental function' as a non-nasal symptom  
118 (Figure 1). Scores  $\geq 2$  were considered 'symptomatic'. The score awarded at inoculation (day 0)  
119 was considered their baseline score, the participant was considered symptomatic if the score  
120 went above baseline.

121 **Figure 1: Participant Symptom Log**

122

| <b>Nasal Symptoms</b>     |   |   |   |   |   |   |   |
|---------------------------|---|---|---|---|---|---|---|
| Sneezing                  | 1 | 2 | 3 | 4 | 5 | 6 | 7 |
| Runny nose                | 1 | 2 | 3 | 4 | 5 | 6 | 7 |
| Congestion                | 1 | 2 | 3 | 4 | 5 | 6 | 7 |
| Itchy nose                | 1 | 2 | 3 | 4 | 5 | 6 | 7 |
| Postnasal drip            | 1 | 2 | 3 | 4 | 5 | 6 | 7 |
| <b>Non-Nasal Symptoms</b> |   |   |   |   |   |   |   |
| Eye symptoms              | 1 | 2 | 3 | 4 | 5 | 6 | 7 |

|                 |                                                                                                     |   |   |   |   |   |   |
|-----------------|-----------------------------------------------------------------------------------------------------|---|---|---|---|---|---|
| Throat symptoms | 1                                                                                                   | 2 | 3 | 4 | 5 | 6 | 7 |
| Cough           | 1                                                                                                   | 2 | 3 | 4 | 5 | 6 | 7 |
| Ear symptoms    | 1                                                                                                   | 2 | 3 | 4 | 5 | 6 | 7 |
| Headache        | 1                                                                                                   | 2 | 3 | 4 | 5 | 6 | 7 |
| Severity score  | <b>Severity score &lt;2 was considered asymptomatic.</b>                                            |   |   |   |   |   |   |
| 1-2             | None to occasional limited episode                                                                  |   |   |   |   |   |   |
| 3-4             | Mild to steady symptoms but easily tolerable                                                        |   |   |   |   |   |   |
| 5-6             | Moderately bothersome or symptoms hard to tolerate/may interfere with daily activities and/or sleep |   |   |   |   |   |   |
| 7               | Unbearably severe or symptoms are so bad/cannot function all of the time                            |   |   |   |   |   |   |

123 Graphical and statistical analyses were performed using GraphPad version 5.0 (GraphPad  
124 Software, La Jolla, CA, USA) and Microsoft Excel, with a p-value of <0.05 considered significant.  
125 Rates of symptoms reported between groups were compared using Fisher's exact tests and Chi  
126 square where appropriate. Correlation analysis was performed using Spearman's rank test. The  
127 daily symptom logs were collected at the next scheduled visit following completion.

128

## 129 Results

130 Fifty-five participants were recruited with an age range of 19-49 years old over a 6- month  
131 period from May-October 2014 (check year). Participants with incomplete symptom severity  
132 score logs were excluded therefore data from 54 participants were analysed. 46 participants  
133 were inoculated with SPN (29 with 6B, 17 with 23F) and 8 with saline (control group).  
134 Participants inoculated with 6B, 23F and saline were similar in age and gender distribution. In  
135 total, 14 participants became experimentally colonised (30.4%), all of which were inoculated  
136 with 6B serotype. None of the participants in the control group developed natural SPN  
137 colonisation during the study.

138 Overall 72% (39/54) of participants reported either or both nasal or non-nasal symptoms during  
139 the 7 days post-inoculation. Of these symptoms, similar rates of nasal and non-nasal symptoms  
140 were reported. 59% (32/54) of participants reported nasal symptoms and 56% (30/54) reported  
141 non-nasal symptoms.

142 No statistical difference was seen between number of participants who reported symptoms in  
143 the experimental SPN positive or negative groups. Similar rates of SPN positive participants  
144 reported nasal symptoms (71%, 10/14) and non-nasal symptoms (57%, 8/14) compared to SPN  
145 negative participants (50%, 16/32 in nasal and non-nasal). See Figure 2.

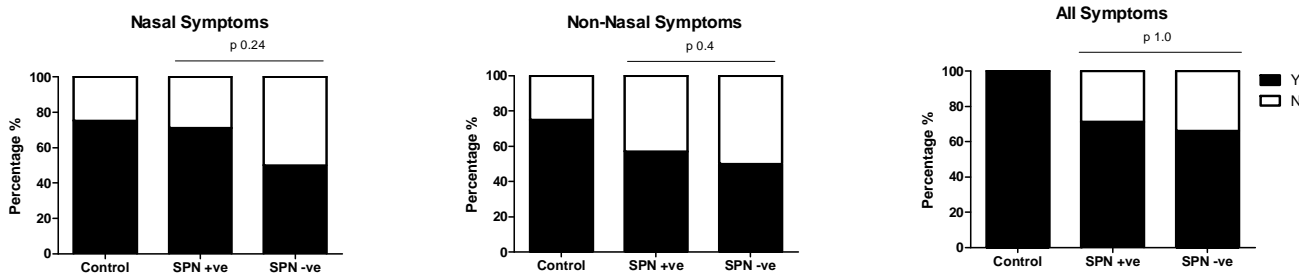

146  
147

148 \* Fischer's exact test

149 **Figure 2. Comparison of nasal and non-nasal symptoms between SPN positive, SPN negative**  
150 **and control participants.**

151 Nasal SPN inoculation did not lead to greater rates of reported symptoms when compared to  
152 the saline inoculation group, as show in Figure 3.. Nasal symptoms were reported by 75% of  
153 participants inoculated with saline (6/8) compared to 57% (26/46) of those who were inoculated  
154 with SPN, no statistical difference was seen (p 0.45). Similarly, no statistical difference was seen  
155 with the reporting of non-nasal symptoms 24/46 (52%) post-SPN inoculation compared to post-



156 saline inoculation 6/8 (75%), (p 0.28). Participants that reported 'any symptom' were higher in  
157 the control group 100% (8/8) compared to 67% (31/46) in the inoculation group, this was not  
158 statistically significant (p 0.09).

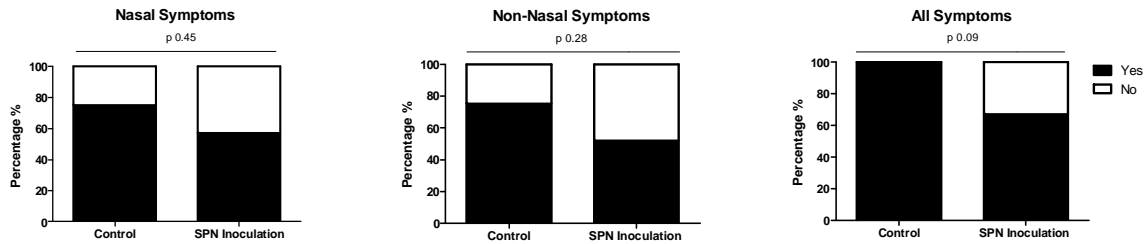

159  
160

161 \* Fischer's exact test

162 **Figure 3. Comparison of nasal and non-nasal symptoms between SPN and saline (control)**  
163 **inoculated groups.**

164 Of the 14 participants colonised with SPN, colonisation density was measured at days 2 and 7.  
165 No direct correlation was seen between density and the mean symptom severity score at day 2  
166 and day 7 for nasal and non-nasal symptoms. Figure 4.

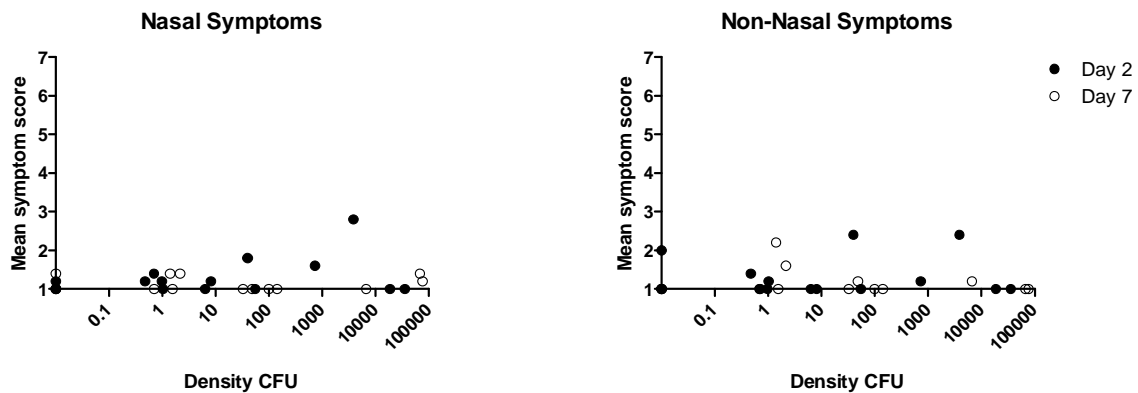

167  
168

169 \* p 0.97, \*\* p 0.86 Spearman's correlation, # p 0.86, ## p 0.83 Spearman's correlation

170 **Fig 4: Correlation between pneumococcal colonisation density (SPN positive) and**  
171 **mean nasal severity scores at days 2 and 7**

172 Viral colonisation data was available for 96% (52/54) participants at baseline. Viral colonisation  
173 was detected in 22% (12/52) of participants, 2 were inoculated with saline and 10 with SPN  
174 [serotype 23F (n=2) and 6B (n=8)].

175 There was no increase in nasal or non-nasal symptoms in virus positive 8/12 (67%) and 7/12  
176 (58%) respectively compared to virus negative participants 23/40 (58% for both symptoms), p  
177 0.74 and p 1.0.

178 Experimental SPN colonisation rates were higher in the presence of virus 6/10 (60%) compared  
179 to 8/35 (23%) in virus negative participants (p <0.05). Virus and SPN positive participants (Co-  
180 colonised) did not report greater rates of nasal or non-nasal symptoms [4/6 (60%) for both  
181 symptoms], compared to SPN positive only [6/8 (75%), 4/8 (50%)] and virus positive only [3/4  
182 (75%), 2/4 (50%).

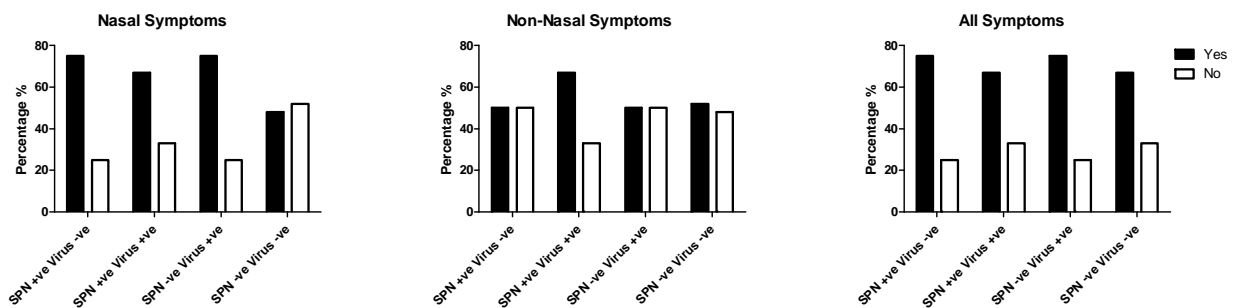

183  
184

185 **Fig 5: Comparison of nasal, non- nasal and all symptoms between virus and SPN**  
186 **positive and negative participants**

## 187 **Discussion**

188 This study shows that pneumococcal (SPN) colonisation in adults is an asymptomatic event. This  
189 novel use of a human challenge model allowed for the study of pneumococcal colonisation and  
190 symptomology in a controlled environment.

191 The strengths of this study are the robust methodology used to assess symptom severity(14) ,  
192 the lack of recall bias (due to daily data log completion) and the use of a control group. Using  
193 this novel human challenge model, the exact day of pneumococcal inoculation and the onset  
194 and termination of each SPN colonisation episode was known allowing association between  
195 symptoms and pneumococcal presence and density. The main limitation of our study was the  
196 total sample size (n=54).

197 Although a previous study in adults used a small sample size (n=14) and did not include the  
198 methods used to support this conclusion(15), it agrees with our data that pneumococcal  
199 colonisation in healthy adults is indeed asymptomatic. Higher symptom severity scores were not  
200 a predictor for colonisation.

201 SPN colonisation is more common in children; therefore, a limitation of this work is the lack of  
202 generalisability of results to all age groups, however there is reasonable evidence exists that SPN  
203 colonisation in children does cause nasal symptoms(9, 16). One study suggested that the  
204 presence of symptoms could be dependent on the serotype of pneumococcus. The authors  
205 reported that colonisation with serotype 19F was strongly associated with symptoms such as  
206 coryza, sneezing, cough and expectoration. However, these children were recruited from a  
207 paediatric hospital emergency room, the study did not report on the diagnosis given to these

208 patients therefore an upper or lower respiratory infection may have been the cause of these  
209 symptoms rather than solely colonisation(16).

210 Rodrigues et al found that rhinitis symptoms, rates of colonisation with SPN and *H. Influenzae*  
211 (*Hi*) in pre-school children decreased with age. Symptoms of rhinitis were reported using the  
212 Symptoms of Nasal Outflow Tally (SNOT) score. Both SPN and *Hi* colonisation was strongly  
213 associated with increased SNOT scores in children <5 years (p 0.002 and 0.001) whereas  
214 colonisation with *S. aureus* was negatively associated with SNOT scores (p 0.04). Interestingly,  
215 40% of asymptomatic children (low SNOT score) were in fact SPN colonised. However, when the  
216 data was analysed considering age, the association between SPN colonisation and SNOT scores  
217 was weak (p 0.06) whereas the association between SNOT scores and *Hi* colonisation remained  
218 strong (p 0.003). They suggest that *Hi* may stimulate rhinitis in children to increase  
219 transmission(9). This study does not however report the effect of co-colonisation on symptoms.

220 Our results suggest that in adults co-colonisation (SPN and virus) is also an asymptomatic  
221 process with similar rates of nasal and non-nasal symptoms reported in all groups. Our results  
222 did show that asymptomatic viral infection at baseline was associated with the acquisition of  
223 SPN colonisation in adults. This is in keeping with results in children which found a virus had a  
224 large effect on SPN colonisation even during asymptomatic viral infections(17). They reported  
225 that the proportion of children with SPN colonisation was higher during prompted visits for  
226 review of URTI symptoms rather than for asymptomatic follow up visits. Due to the small sample  
227 size of SPN and virus co-colonisers (n=6), it is difficult to make strong assumptions about the  
228 symptomology of this co-infection from our study. Viral swabs were also only performed at  
229 baseline (up to 7 days prior to inoculation) therefore we cannot assess correlation between  
230 symptoms and viral status at each point, nor was density measured.

231 In conclusion we have shown that neither nasopharyngeal inoculation nor experimental  
232 pneumococcal colonisation cause nasal or non-nasal symptoms in adults. Our results suggest  
233 that asymptomatic viral infection prior to nasopharyngeal inoculation or experimental SPN  
234 colonisation does not increase nasal or non-nasal symptoms. A better understanding of the  
235 process of viral co-infection in adults is needed, further research into the symptoms caused by  
236 viral infection prior to or following acquisition of SPN colonisation would add to this study's  
237 preliminary data. A key question, given the difference between adults and children, is the  
238 association between colonisation symptoms and transmission; our study confirms that  
239 pneumococcal colonisation in adults is asymptomatic, but does not address transmission  
240 dynamics.

241 **Acknowledgements**

242

243 We would like to thank the members of our DMSC - Professor Robert C Read, University of  
244 Southampton (Chair), Professor David Lalloo and Dr Brian Faragher, Liverpool School of Tropical  
245 Medicine (LSTM), the respiratory research nurses, Clinical Research Unit staff, the Infectious  
246 diseases team, RLBUHT laboratories and clinical trials pharmacy.

247

248 This work would not have been possible without members of the LSTM respiratory team;  
249 Debbie Jenkins for data input, Jessica Owugha and Shaun Pennington for their involvement with  
250 statistical analysis and Jenna Gritzfeld for involvement in bacterial inoculum preparation, sample  
251 processing, storage and interpretation of samples and results.

252

253

254 **References**

255

- 256 1. Goldblatt D, Hussain M, Andrews N, Ashton L, Virta C, Melegaro A, et al.  
257 Antibody responses to nasopharyngeal carriage of *Streptococcus pneumoniae* in  
258 adults: a longitudinal household study. 2005;192(3):387-93.
- 259 2. Bogaert D, De Groot R, Hermans PW. *Streptococcus pneumoniae*  
260 colonisation: the key to pneumococcal disease. *Lancet Infect Dis*. 2004;4(3):144-54.
- 261 3. Cobey S, Lipsitch M. Niche and neutral effects of acquired immunity permit  
262 coexistence of pneumococcal serotypes. *Science*. 2012;335(6074):1376-80.
- 263 4. Margolis E, Yates A, Levin BR. The ecology of nasal colonization of  
264 *Streptococcus pneumoniae*, *Haemophilus influenzae* and *Staphylococcus aureus*: the  
265 role of competition and interactions with host's immune response. *BMC*  
266 *microbiology*. 2010;10(1):59.
- 267 5. Simell B, Auranen K, Kayhty H, Goldblatt D, Dagan R, O'Brien KL. The  
268 fundamental link between pneumococcal carriage and disease. *Expert Rev Vaccines*.  
269 2012;11(7):841-55.
- 270 6. Ferreira DM, Neill DR, Bangert M, Gritzfeld JF, Green N, Wright AK, et al.  
271 Controlled human infection and rechallenge with *Streptococcus pneumoniae* reveals  
272 the protective efficacy of carriage in healthy adults. *Am J Respir Crit Care Med*.  
273 2013;187(8):855-64.
- 274 7. McCool TL, Weiser JN. Immunity. Limited role of antibody in clearance of  
275 *Streptococcus pneumoniae* in a murine model of colonization. 2004;72(10):5807-  
276 13.
- 277 8. Jochems SP, Weiser JN, Malley R, Ferreira DM. The immunological  
278 mechanisms that control pneumococcal carriage. 2017;13(12):e1006665.
- 279 9. Rodrigues F, Foster D, Nicoli E, Trotter C, Vipond B, Muir P, et al.  
280 Relationships between rhinitis symptoms, respiratory viral infections and  
281 nasopharyngeal colonization with *Streptococcus pneumoniae*, *Haemophilus*  
282 *influenzae* and *Staphylococcus aureus* in children attending daycare.  
283 2013;32(3):227-32.
- 284 10. Fan RR, Howard LM, Griffin MR, Edwards KM, Zhu Y, Williams JV, et al.  
285 Nasopharyngeal pneumococcal density and evolution of acute respiratory illnesses  
286 in young children, Peru, 2009–2011. 2016;22(11):1996.

- 287 11. Collins AM, Wright AD, Mitsi E, Gritzfeld JF, Hancock CA, Pennington SH, et al.  
288 First Human Challenge Testing of a Pneumococcal Vaccine - Double Blind  
289 Randomised Controlled Trial. *Am J Respir Crit Care Med*. 2015.
- 290 12. Glennie S, Gritzfeld JF, Pennington SH, Garner-Jones M, Coombes N, Hopkins  
291 MJ, et al. Modulation of nasopharyngeal innate defenses by viral coinfection  
292 predisposes individuals to experimental pneumococcal carriage. *Mucosal Immunol*.  
293 2016;9(1):56-67.
- 294 13. Gritzfeld JF, Wright AD, Collins AM, Pennington SH, Wright AK, Kadioglu A, et  
295 al. Experimental human pneumococcal carriage. *Journal of visualized experiments:*  
296 *JoVE*. 2013(72).
- 297 14. Spector SL, Nicklas RA, Chapman JA, Bernstein IL, Berger WE, Blessing-Moore  
298 J, et al. Symptom severity assessment of allergic rhinitis: part 1. *Annals of Allergy,*  
299 *Asthma & Immunology*. 2003;91(2):105-14.
- 300 15. McCool TL, Cate TR, Moy G, Weiser JN. The immune response to  
301 pneumococcal proteins during experimental human carriage. *J Exp Med*.  
302 2002;195(3):359-65.
- 303 16. Neves FP, Pinto TC, Correa MA, dos Anjos Barreto R, de Souza Gouveia  
304 Moreira L, Rodrigues HG, et al. Nasopharyngeal carriage, serotype distribution and  
305 antimicrobial resistance of *Streptococcus pneumoniae* among children from Brazil  
306 before the introduction of the 10-valent conjugate vaccine. *BMC Infect Dis*.  
307 2013;13:318.
- 308 17. DeMuri GP, Gern JE, Eickhoff JC, Lynch SV, Wald ER. Dynamics of Bacterial  
309 Colonization With *Streptococcus pneumoniae*, *Haemophilus influenzae*, and  
310 *Moraxella catarrhalis* During Symptomatic and Asymptomatic Viral Upper  
311 Respiratory Tract Infection. *Clin Infect Dis*. 2018;66(7):1045-53.

312
